# Supplementary material for: Region Evolution eXplorer – A tool for discovering evolution trends in ontology regions
Source: PubMed Central journal article supplement (PMC4450457; doi:10.1186/s13326-015-0020-6), 2015-06-01
Supplement: 13326_2015_20_MOESM1_ESM.pdf [file 13326_2015_20_MOESM1_ESM.pdf]

|              | 2012            |                  |                  | 2013            |                  |                  |
|--------------|-----------------|------------------|------------------|-----------------|------------------|------------------|
|              | <i>abs_size</i> | <i>abs_costs</i> | <i>avg_costs</i> | <i>abs_size</i> | <i>abs_costs</i> | <i>avg_costs</i> |
| <b>GO-BP</b> | 25,021          | 22,278           | 0.89             | 26,133          | 15,440           | 0.59             |
| <b>GO-MF</b> | 10,416          | 3,158            | 0.30             | 10,546          | 1,164            | 0.11             |
| <b>GO-CC</b> | 3,225           | 1,153            | 0.36             | 3,464           | 2,080            | 0.60             |
| <b>ChEBI</b> | 38,360          | 33,615           | 0.88             | 42,946          | 40,894           | 0.95             |
| <b>NCIT</b>  | 95,949          | 21,000           | 0.22             | 105,111         | 29,970           | 0.29             |
| <b>MA</b>    | 3,113           | 0                | 0.00             | 3,174           | 187              | 0.06             |
